# Supplementary material for: Replicating novel carbon nanostructures with 3D macroporous silica template
Source: Royal Society of Chemistry journal article supplement (doi:10.1039/b503691g), 2005-01-01

## Electronic Supporting Information

# Replicating novel carbon nanostructures with 3D macroporous silica template

*Zuocheng Zhou, Qingfeng Yan, Fabing Su, and X. S. Zhao\**

Department of Chemical and Biomolecular Engineering, National University of Singapore

1. Calculation of the stop band positions of macroporous silicas before and after carbon coating.

### Before coating of carbon layer:

For 220 nm porous silica:

$$n_{eff} = 1 \times 0.74 + 1.4 \times 0.26 = 1.104$$

$$\lambda = \sqrt{8/3} dn_{eff} = \sqrt{8/3} \times 220 \times 1.104 = 397 \text{ nm}$$

For 300 nm porous silica:

$$n_{eff} = 1 \times 0.74 + 1.4 \times 0.26 = 1.104$$

$$\lambda = \sqrt{8/3} dn_{eff} = \sqrt{8/3} \times 300 \times 1.104 = 541 \text{ nm}$$

### After coating of carbon layer:

For 220 nm carbon coated silica (shell thickness: 21 nm):

$$\text{Volume fraction of air: } V_{air} / V_{pore} = (4/3)\pi r^3 / (4/3)\pi R^3 = (r/R)^3 = 0.530$$

$$\varphi_{air} = 0.74 \times 0.530 = 0.392$$

Average refractive index:

$$\begin{aligned} n_{eff} &= n_{air} \times V_{air} + n_{carbon} \times V_{carbon} + n_{silica} \times V_{silica} \\ &= 1 \times 0.392 + 2.1 \times (0.74 - 0.392) + 1.4 \times 0.26 = 1.487 \end{aligned}$$

$$\text{Position of bandgap: } \lambda = \sqrt{8/3} dn_{eff} = \sqrt{8/3} \times 220 \times 1.487 = 534 \text{ nm}$$

For 300 nm carbon coated silica (shell thickness: 29 nm):

$$\text{Volume fraction of air: } V_{air} / V_{pore} = (4/3)\pi r^3 / (4/3)\pi R^3 = (r/R)^3 = 0.525$$

$$\varphi_{air} = 0.74 \times 0.525 = 0.389$$

$$n_{eff} = n_{air} \times V_{air} + n_{carbon} \times V_{carbon} + n_{silica} \times V_{silica} = 1 \times 0.389 + 2.1 \times (0.74 - 0.389) + 1.4 \times 0.26 = 1.490$$

$$\text{Position of bandgap: } \lambda = \sqrt{8/3} dn_{eff} = \sqrt{8/3} \times 300 \times 1.490 = 730 \text{ nm}$$

2. **Fig. S1.** A scheme illustration showing the synthetic steps at which different compositional and structural carbons can be obtained.

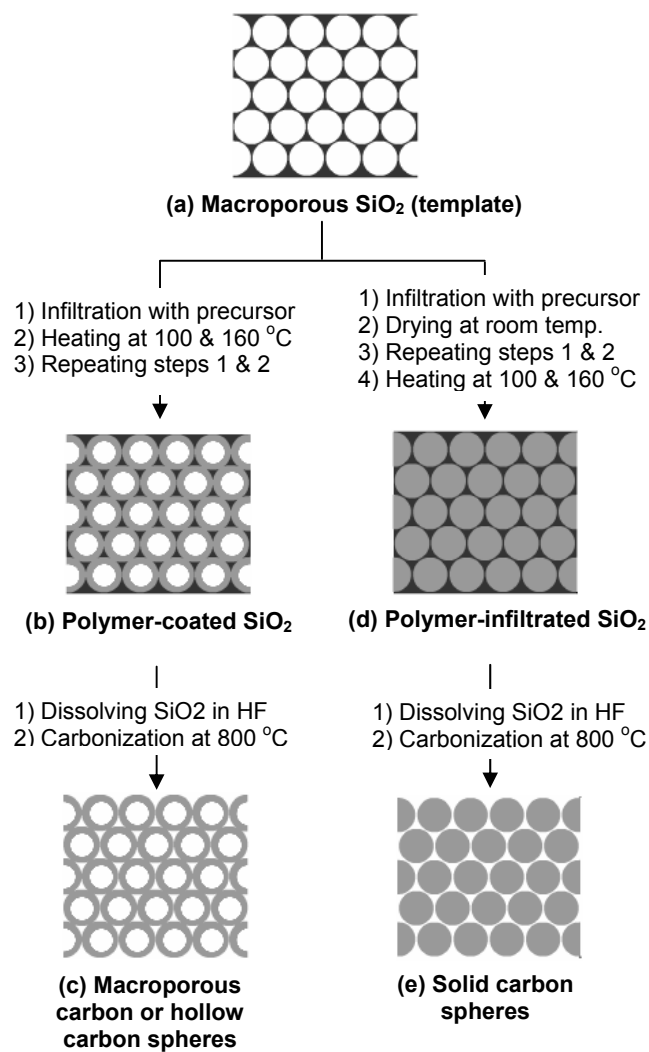

3. **Fig. S2.** N<sub>2</sub> adsorption/desorption isotherms and pore size distribution curve of hollow carbon spheres with pores of 190 nm in diameter and massive micropores.

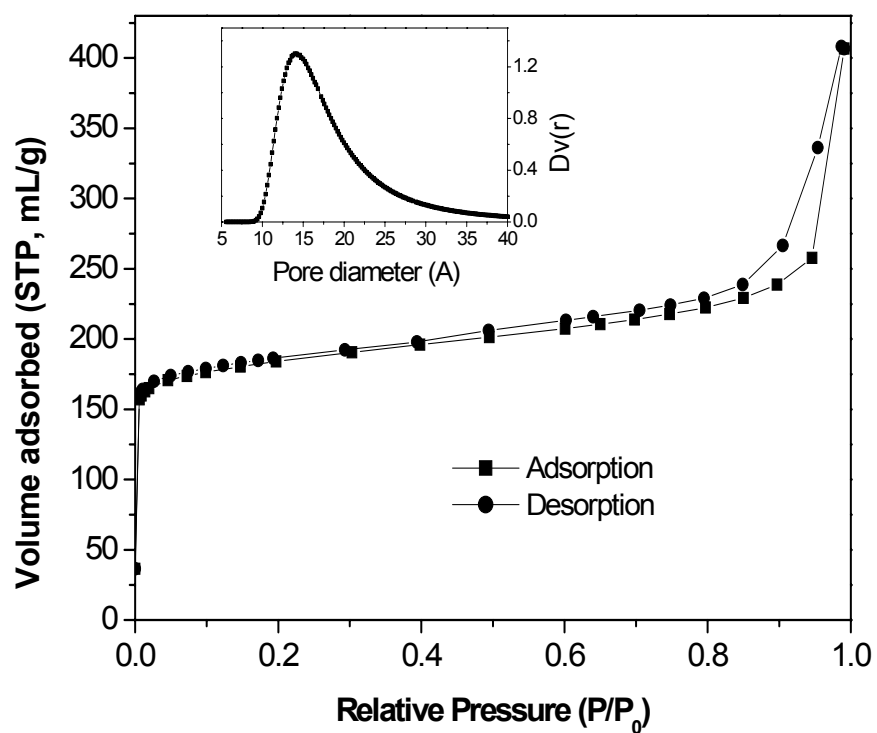

4. **Figure S3.** Reflectance microscope photographs of pure macroporous silicas and carbon-silica composites. (a) and (c): macroporous silica with pore diameters of 220 and 300 nm respectively; (b) and (d): one-time coating of carbon of (a) and (c).

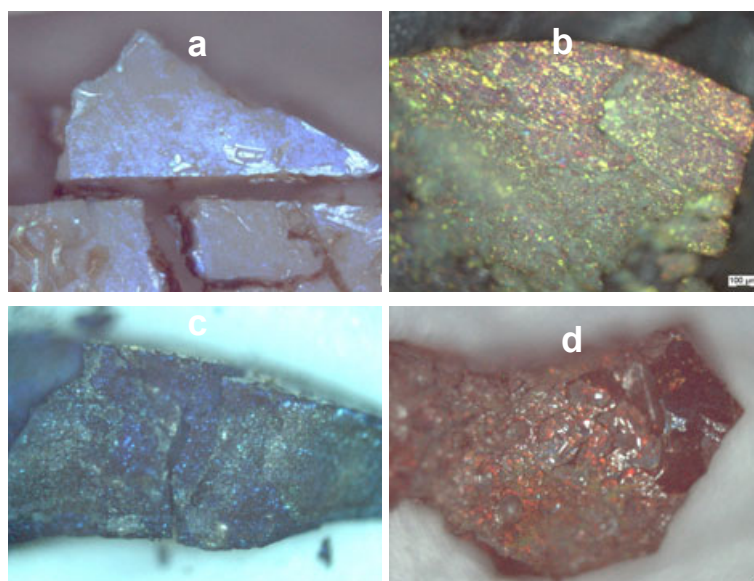

5. **Figure S4.** Photonic band structures of (a) a porous silica template, (b) a carbon-silica composite with a carbon layer thickness of 30% of the pore size of the porous silica template, and (c) a carbon-silica composite with a carbon layer thickness of 50% of the pore size of the porous silica template. Here we assume that the structures is a close-packed fcc lattice and the refractive indexes of carbon, silica and air are 2.1, 1.4, and 1, respectively.

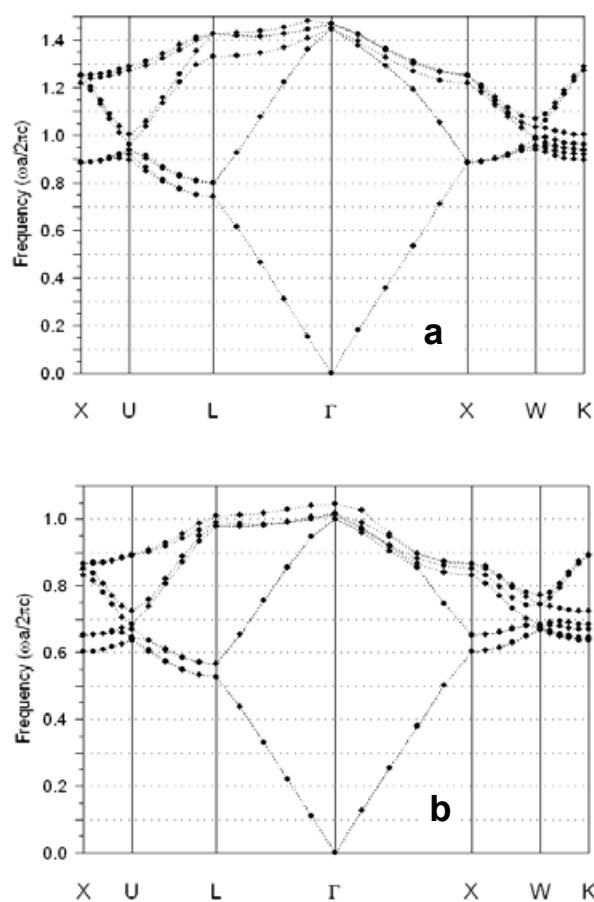

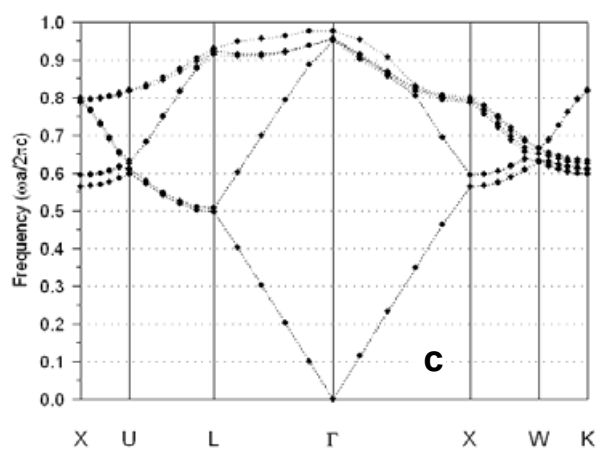

Supplement: b503691g.pdf [file b503691g.pdf]
